# Supplementary material
Source: Springer Nature journal article supplement (https://www.springermedizin.de/resource/supplementary/12967_2012_1396_MOESM1_ESM.pdf/9573398)

## Tumor regions (CT & IM)

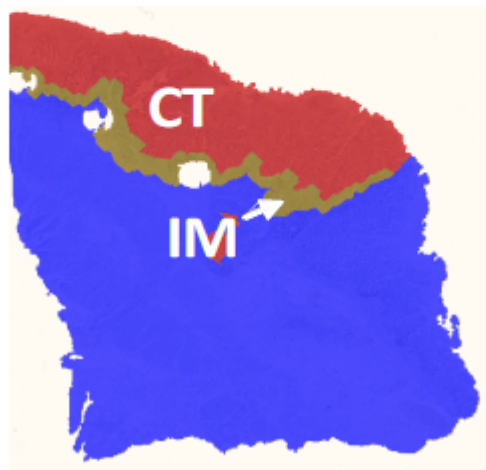

## Immunostainings

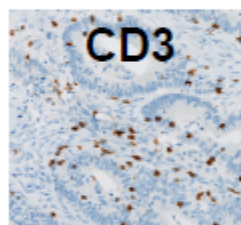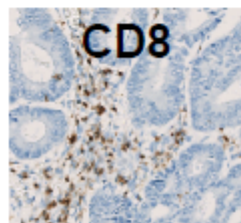

## Immunoscore (CT+IM)

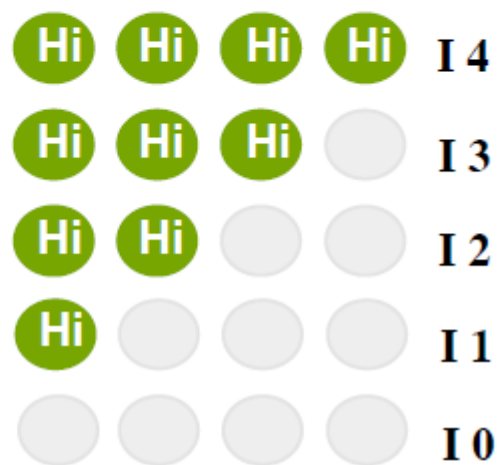

**Digital Pathology**

Supplement: MOESM1 [file 9573398]
